# Supplementary material for: Multi-resonance organoboron-based fluorescent probe for ultra-sensitive, selective and reversible detection of fluoride ions
Source: Royal Society of Chemistry journal article supplement (doi:10.1039/d0tc05496h), 2021-01-01
Supplement: d0tc05496h1.pdf [file d0tc05496h1.pdf]

## Electronic Supporting Information

# **Multi-resonance organoboron-based fluorescent probe for ultra-sensitive, selective and reversible detection of fluoride ion**

Yanyu Qi,<sup>a,b</sup> Xiaosong Cao,<sup>a</sup> Yang Zou\*<sup>a</sup> and Chuluo Yang\*<sup>a,c</sup>

<sup>a</sup> Shenzhen Key Laboratory of Polymer Science and Technology, College of Materials Science and Engineering, Shenzhen University, Shenzhen 518060, People's Republic of China

<sup>b</sup> College of Physics and Optoelectronic Engineering, Shenzhen University, Shenzhen 518060, People's Republic of China

<sup>c</sup> Hubei Key Lab on Organic and Polymeric Optoelectronic Materials, Department of Chemistry, Wuhan University, Wuhan, 430072, People's Republic of China.

### **Corresponding authors**

\*Email: yangzou@szu.edu.cn

\*Email: clyang@szu.edu.cn

|                           |   |
|---------------------------|---|
| Experimental Section..... | 2 |
| Figures and Schemes.....  | 5 |

## Experimental Section

**Materials.** All reagents and chemicals (at least analytical grade) were purchased from commercial sources and immediately used without further purification. Solvents were all dried and degassed using the Grubbs-type solvent purification system, a product of Innovative Technology, Inc. Schlenk technology was strictly performed under argon conditions in all reactions. The target compound **BNCz** was synthesized and characterized according to the literature.<sup>1</sup>

**Instrumental Methods.** <sup>1</sup>H NMR and <sup>13</sup>C NMR spectra were acquired on Bruker AV 600 NMR spectrometer at room temperature using CDCl<sub>3</sub> as solvent, and referenced externally to SiMe<sub>4</sub>. The multiplicities of the signals are indicated as “s”, “d”, “t” or “m”, which stand for singlet, doublet, triplet, and multiplet, respectively. Carbon atoms directly bonded to boron atom are not always observed in the <sup>13</sup>C NMR spectra due to quadrupolar relaxation leading to considerable signal broadening.<sup>2-4</sup> <sup>11</sup>B NMR spectra were recorded on Bruker AV 600 NMR spectrometer at room temperature using CDCl<sub>3</sub> and tetrahydrofuran-d<sub>8</sub> as solvent, and chemical shifts (δ) are given in ppm relative to BF<sub>3</sub>·OEt<sub>2</sub>. High-resolution mass spectra (HRMS) were collected on a Bruker maxis UHR-TOF mass spectrometer in an ESI positive mode. UV-Vis spectra in solution were recorded on a UV-3100 spectrophotometer at room temperature. Steady-state fluorescence emission spectra were performed at room temperature on a Hitachi F-7000 fluorescence spectrophotometer with xenon lamp as the light source. The absolute fluorescence quantum yields were measured on a Quantaaurus - QY measurement system (C9920-02, Hamamatsu Photonics) equipped with a calibrated integrating sphere and were excited at 467 nm. During the PLQY measurements, the integrating sphere was purged with pure and dry argon to maintain an inert environment. The fluorescence lifetime measurements were performed at room temperature on a single photon counting spectrometer from Edinburgh Instruments (FLS920) with a Picosecond Pulsed UV-LASTER (LASTER377) as the excitation source. The optical images were recorded using a Canon 70D camera.

**X-ray Crystallography.** Crystals of appropriate quality for X-ray diffraction studies were removed and covered with a thin layer of hydrocarbon oil (Paratone-N). A suitable crystal was then selected, attached to a glass fiber. All data were collected using a Bruker APEX II CCD detector/D8 diffractometer using Ga/Cu K $\alpha$  radiation. The data were corrected for absorption through Gaussian integration from indexing of the crystal faces. Structures were solved using the direct methods

programs SHELXS-97, and refinements were completed using the program SHELXL-97.<sup>5</sup> The crystallographic information has been deposited with Cambridge Crystallographic Data Centre, and signed to CCDC code 2032277 for **BNCz**, and 2032276 for **BNCz-FO**.

**Theoretical Calculations.** The ground state geometries of gas state were fully optimized by B3LYP method including Grimme's dispersion correction with 6-31G (d, p) basis sets using Gaussian 09 software package<sup>6</sup>. HOMO and LUMO were visualized with Gaussview 5.0.

**Photochemical Stability.** The photochemical stability of **BNCz** in THF solution was tested using a Hitachi F-7000 fluorescence spectrophotometer with a time scan pattern and a 150 W Xenon lamp was employed as the light source. Typical irradiation time was 2.5 h.

**Anion sensing studies.** Stock solutions (1 mM) of probe **BNCz** was prepared in THF and the final concentrations were 10  $\mu\text{M}$  by a 100x dilution of the stock solution. Solutions (0.1 and 1 mM) of the tetrabutylammonium salts of the respective anions were prepared in THF. The concentration of sensor compounds was kept constant throughout the titration process, while adding increasing amounts of anion to the sensor solution. Then the UV-vis and fluorescence emission spectra were recorded at room temperature. The selectivity properties were explored towards  $\text{Cl}^-$ ,  $\text{Br}^-$ ,  $\text{I}^-$ ,  $\text{NO}_3^-$ ,  $\text{ClO}_4^-$ ,  $\text{BF}_4^-$ ,  $\text{PF}_6^-$ ,  $\text{AcO}^-$  and  $\text{H}_2\text{PO}_4^-$  (50  $\mu\text{M}$ ) by the sensor concentration in THF in the fluorescence spectra.

**Stoichiometry and Job's plot experiment.** Stoichiometry was determined by Job's plot method and monitored by fluorescence spectrometry. Stock solutions of the same concentration (0.2 mM) of **BNCz** and  $\text{F}^-$  anions were prepared in THF. A series of proportions of  $\text{F}^-$  varying from 0 to 1.0 was prepared with a constant total concentration (20  $\mu\text{M}$ ). After shaking the vials for a few minutes, the fluorescence emission spectra of the solutions were obtained through fluorescence titration at room temperature. Finally, the intensity changes at an emission wavelength of 483 nm against the concentration ratio of  $\text{F}^-$  to the overall concentration were obtained, namely, the Job's plot.

**Preparation of Test Strips.** Blank test strips were prepared by cutting ordinary photographic paper (2 cm  $\times$  2 cm). The strips as obtained were further treated by immersing them into the THF solution of **BNCz** ( $1 \times 10^{-3} \text{ mol} \cdot \text{L}^{-1}$ ), and then dried in air at room temperature.

**Pater Test of  $\text{F}^-$ .** The aqueous solutions of  $\text{F}^-$  with definite concentrations were prepared by diluting its stock solution ( $1 \text{ mol} \cdot \text{L}^{-1}$ ) with tap water. Then, the TBAF aqueous solutions as obtained

( $1 \times 10^{-6} \sim 1 \times 10^{-1} \text{ mol} \cdot \text{L}^{-1}$ ) and tap water were spotted onto the test strips using a micro-syringe. After evaporation of the solvent at room temperature, the test paper was illuminated with handheld UV light (365 nm). The dark spots were identified by an independent observer, and each set of experiments was repeated three times for consistency.

**Determination of Detection Limit (DL).** The detection limit of the sensor has been determined according to the following equations or functions:

$$S_b = \sqrt{\frac{\sum_{i=1}^n (x_i - \bar{x})^2}{n-1}} \quad (1)$$

$$S = \frac{\Delta I}{\Delta c} \quad (2)$$

$$DL = \frac{3S_b}{S} \quad (3)$$

The standard deviation ( $S_b$ ) regarding present **BNCz** and the instrument was determined by measuring the fluorescence intensities ( $x_i$ ) of **BNCz** in THF for more than 100 times, and calculating the corresponding average intensity ( $\bar{x}$ ) firstly. By fitting the intensity data and the average intensity as obtained into equation (1), the value of the standard deviation ( $S_b$ ) was obtained.

Then,  $\text{F}^-$  was added into the solution of **BNCz** with different concentrations, and then the fluorescence emission intensities were recorded (**Figure 1b**). Corresponding variations in intensity ( $\Delta I$ ) and the  $\text{F}^-$  concentration ( $\Delta c$ ) were calculated. By fitting the data into equation(2),  $S$  value for the present system was obtained.

Finally, with the values of  $S_b$  and  $S$  as determined, the  $DL$  for the present system was calculated according to equation (3).

## Supplementary Schemes and Figures

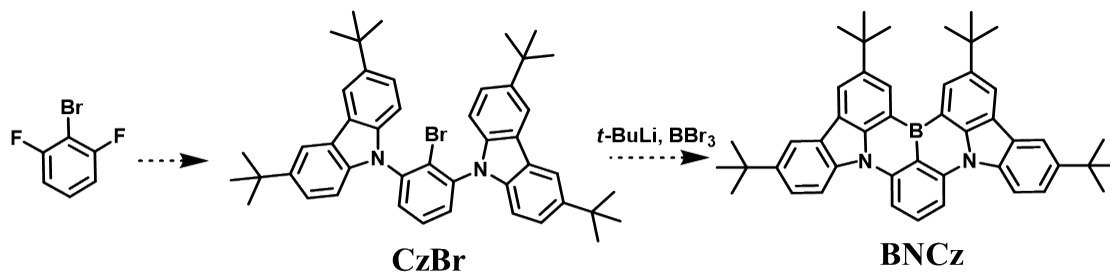

Scheme S1. Synthetic procedures of BNCz.

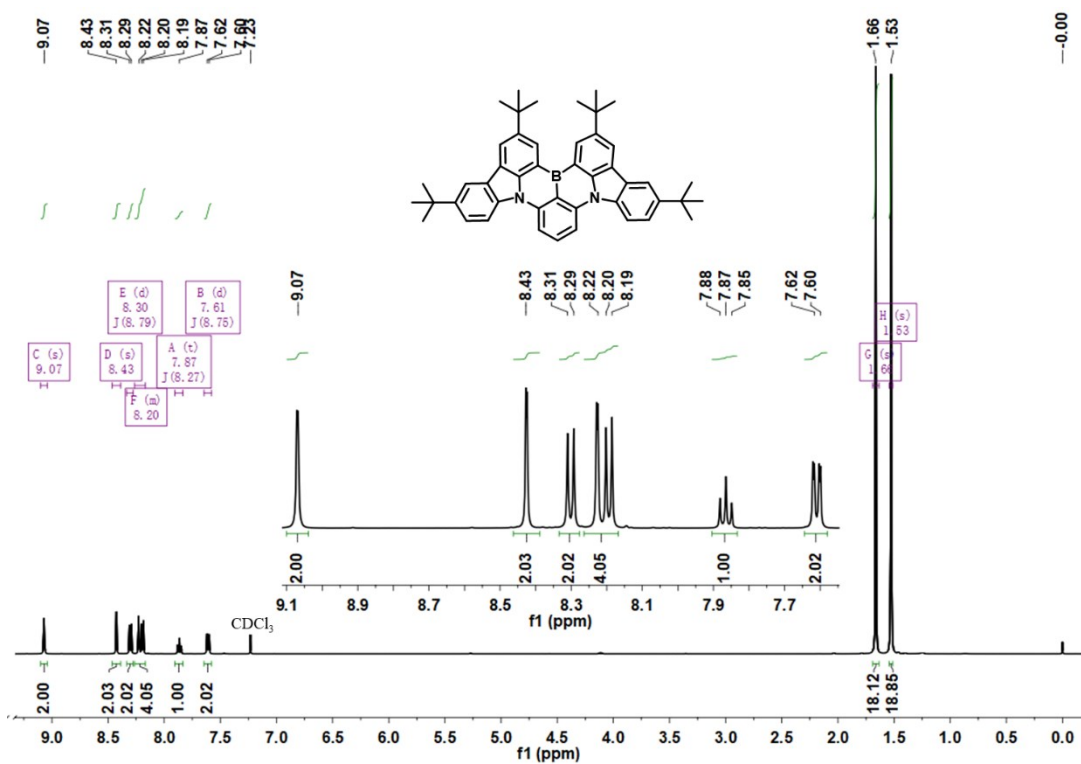

Figure S1.  $^1\text{H}$  NMR spectrum of BNCz.

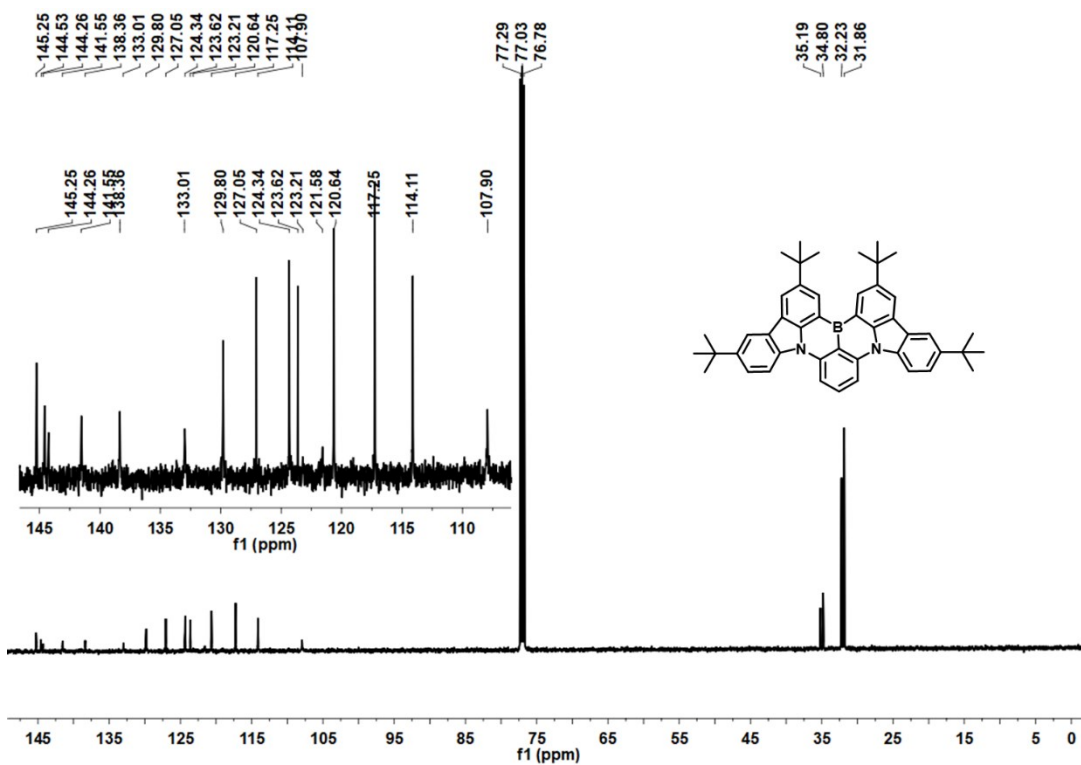

Figure S2.  $^{13}\text{C}$  NMR spectrum of BNCz.

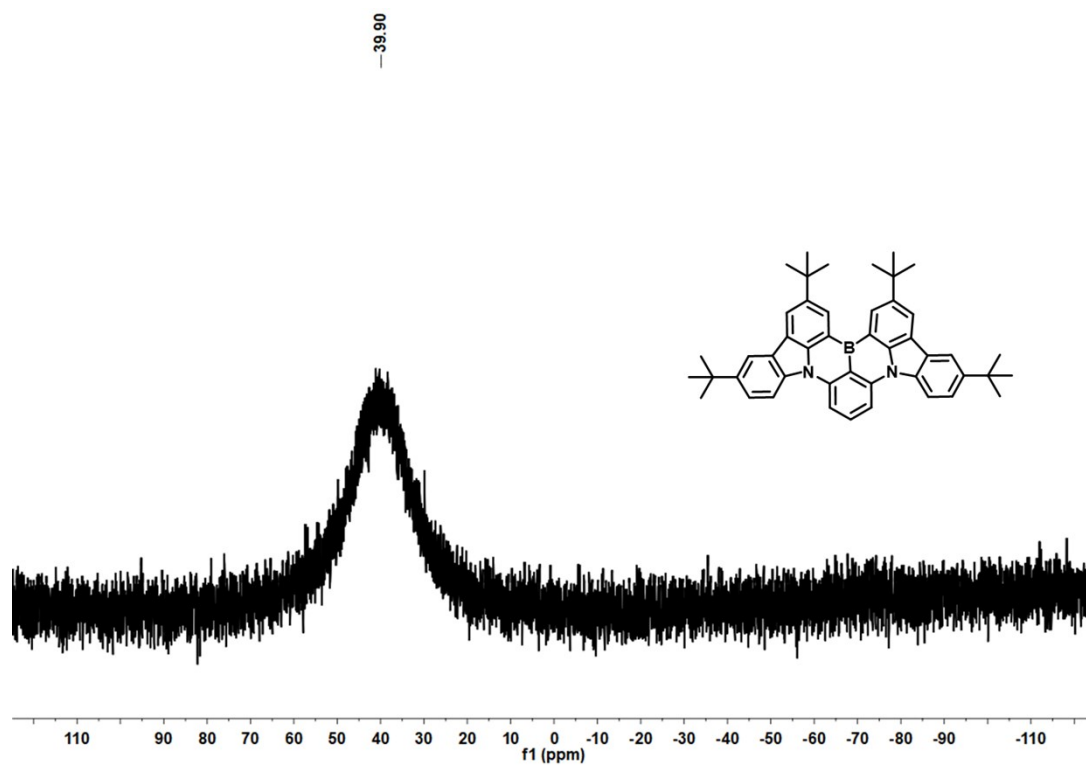

Figure S3.  $^{11}\text{B}$  NMR spectrum of BNCz.

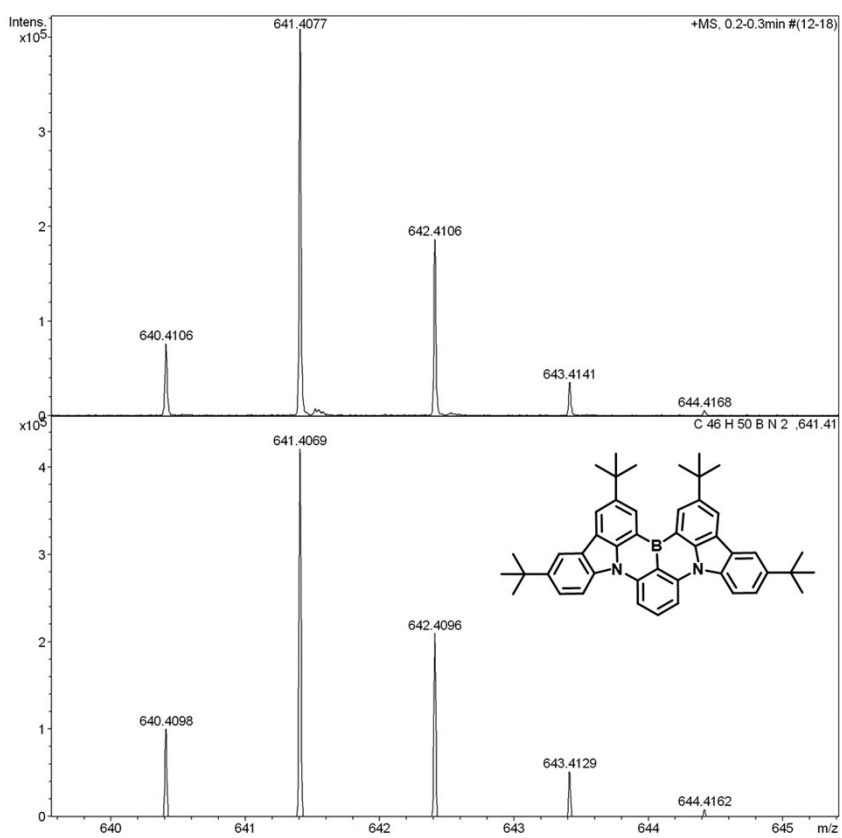

Figure S4. HRMS spectrum of BNCz.

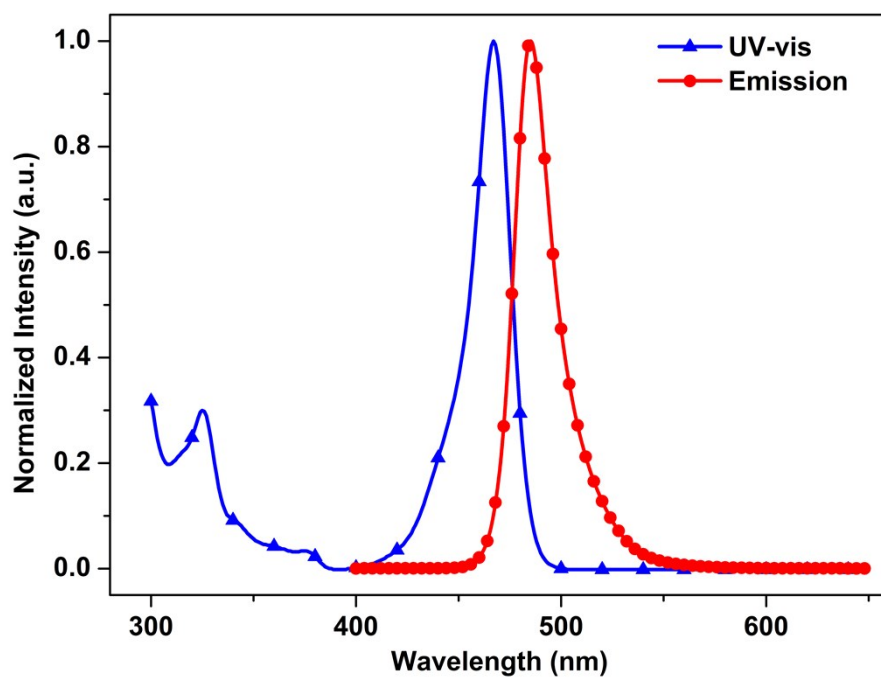

**Figure S5.** Normalized UV–vis absorption and fluorescence emission spectra ( $\lambda_{\text{ex}}=467$  nm).



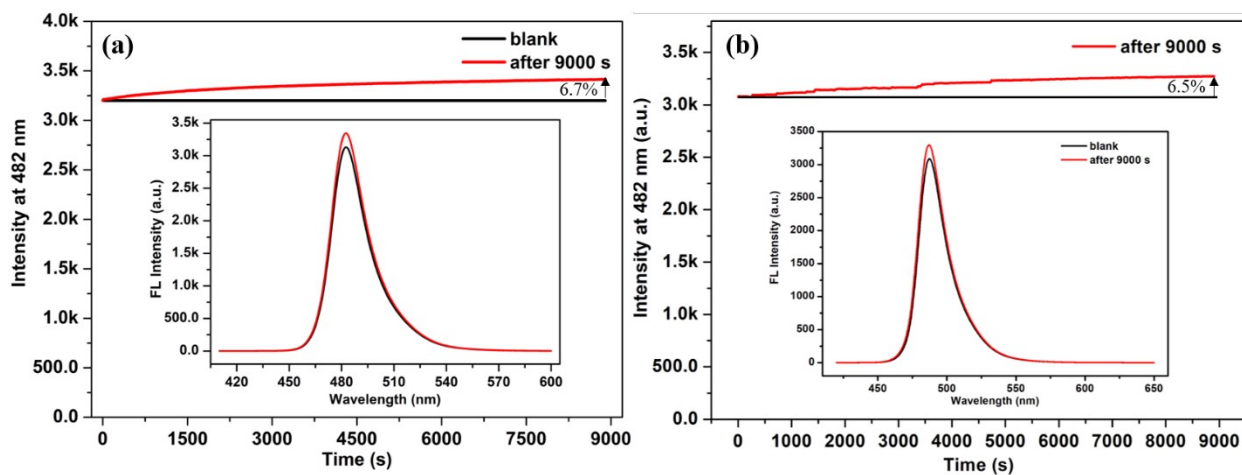

**Figure S6.** Photochemical stability monitored at 482 nm of **BNCz** in THF (a) and THF/H<sub>2</sub>O (v:v, 1:1) (b) (1  $\mu$ M). Inset is the spectra recorded before and after 2.5 h continuous irradiation.

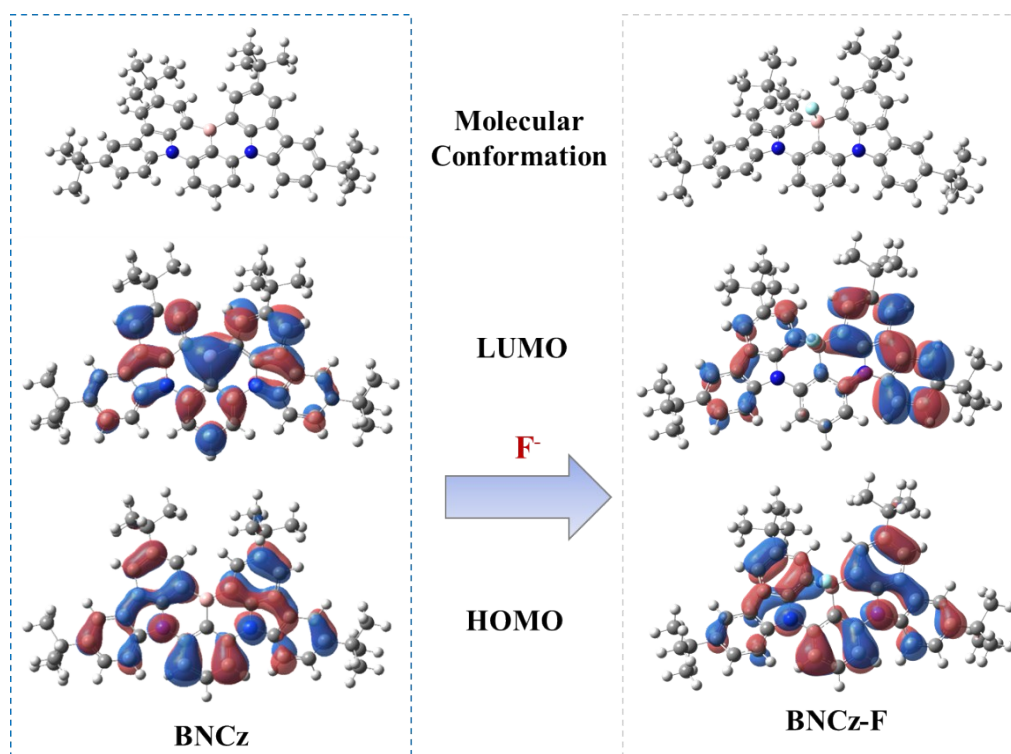

**Figure S7.** Molecular conformation and distributions of frontier molecular orbitals of **BNCz** and **BNCz-F** based on DFT calculations with B3LYP method.

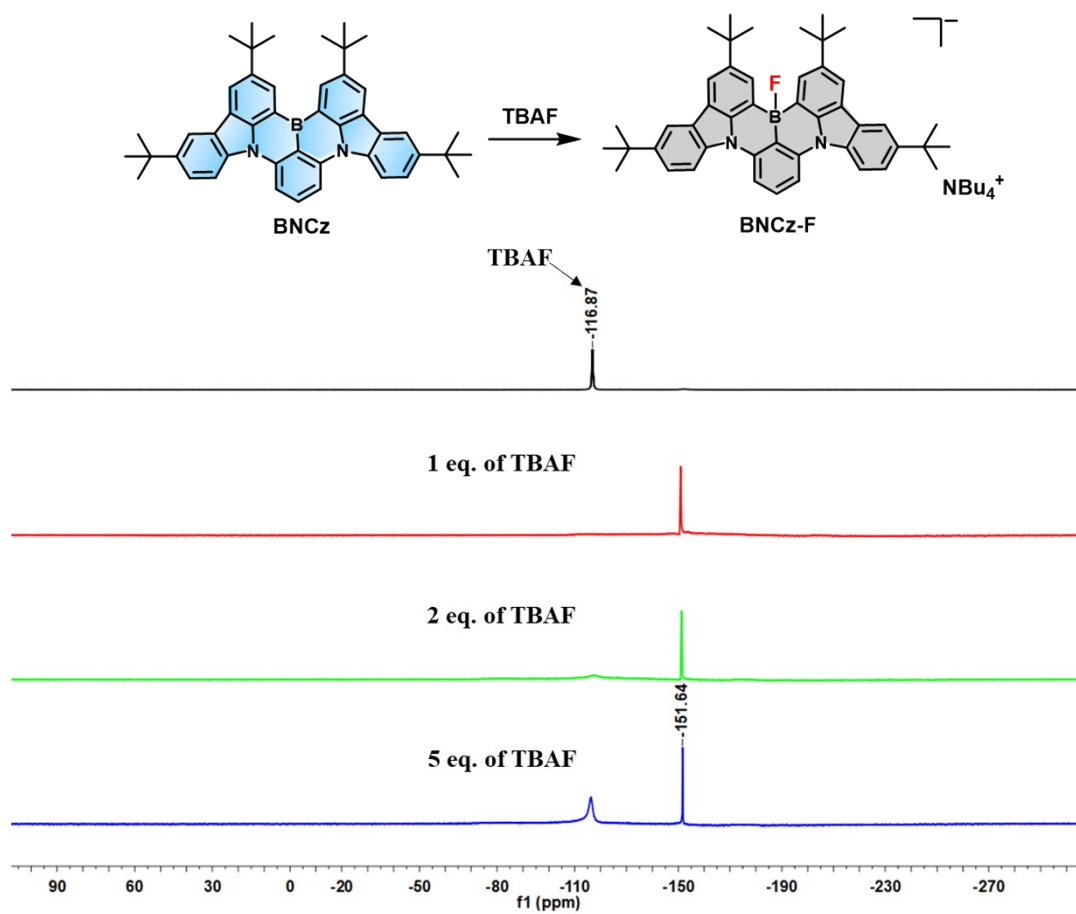

**Figure S8.** (top) Fluoride anion binding to compound **BNCz**. (bottom)  $^{19}\text{F}$  NMR spectra of a mixture of **BNCz** after addition of 1, 2 and 5 equivs. of TBAF.

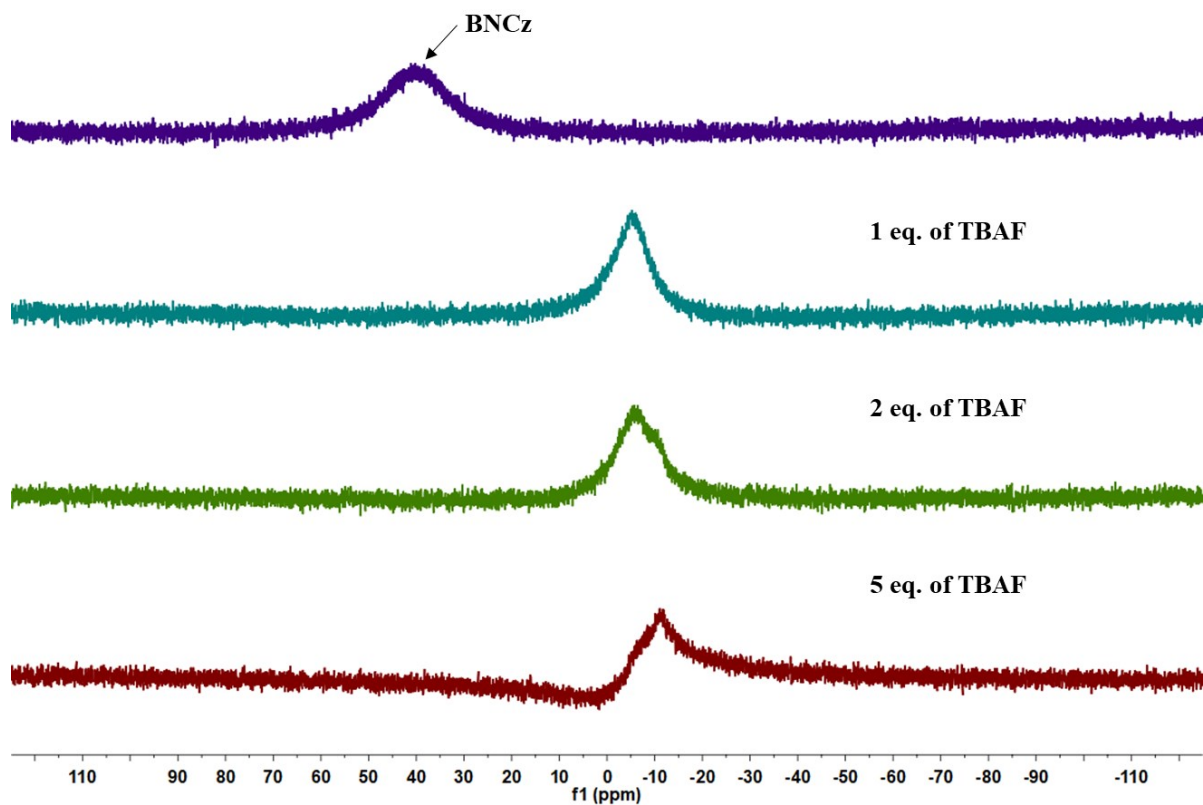

**Figure S9.**  $^{11}\text{B}$  NMR spectra of a mixture of **BNCz** after addition of 1, 2 and 5 equivs. of TBAF.

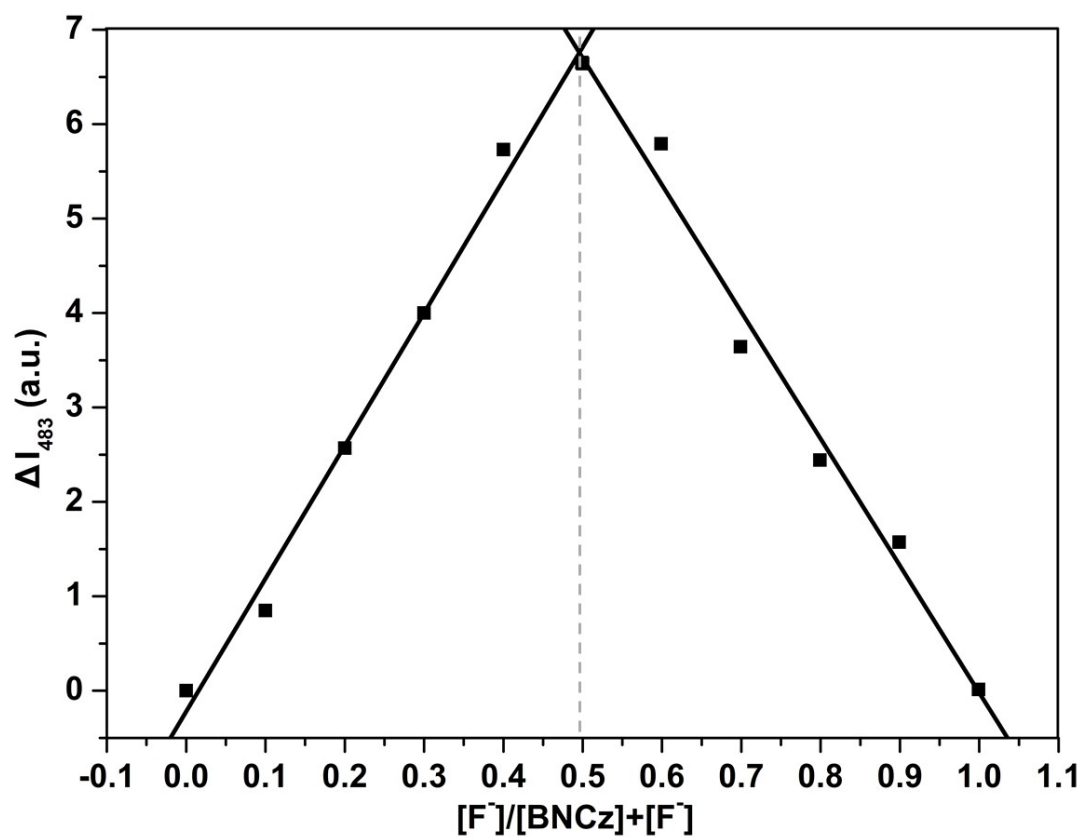

**Figure S10.** Job's Plot for complexation of **BNCz** with  $F^-$ , the total concentration for the experiments is  $20 \mu\text{M}$  ( $\lambda_{\text{ex}} = 467 \text{ nm}$ ).

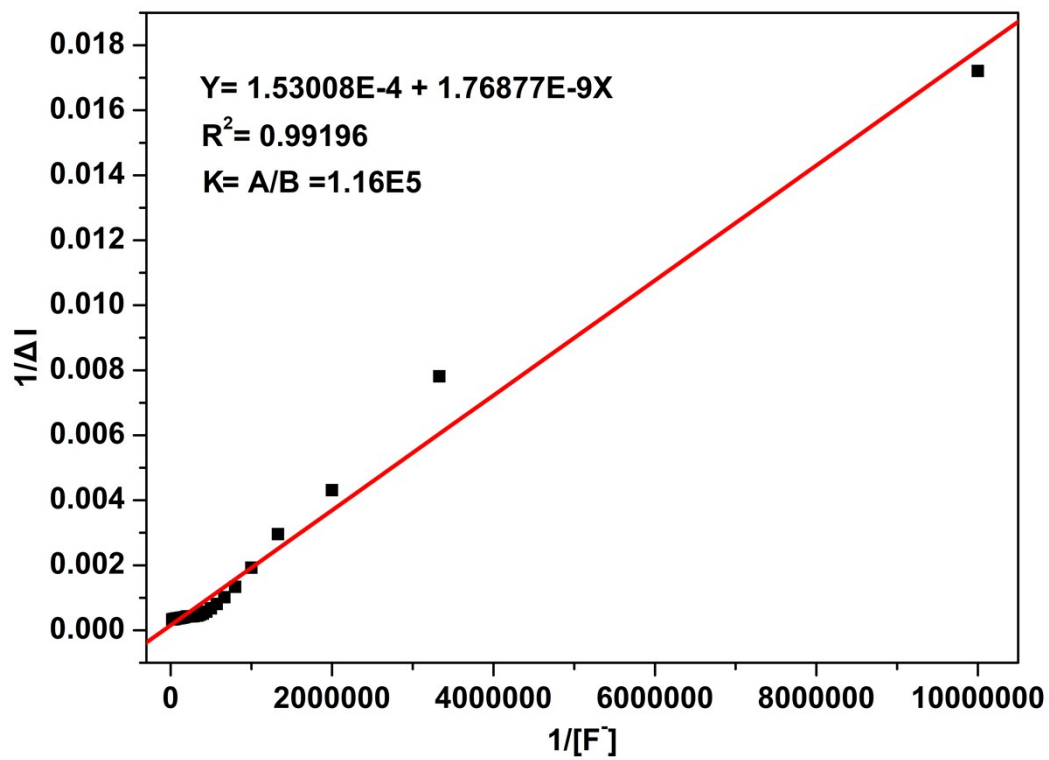

Figure S11. Benesi–Hildebrand plot for complexation of **BNCz** with  $F^-$ .

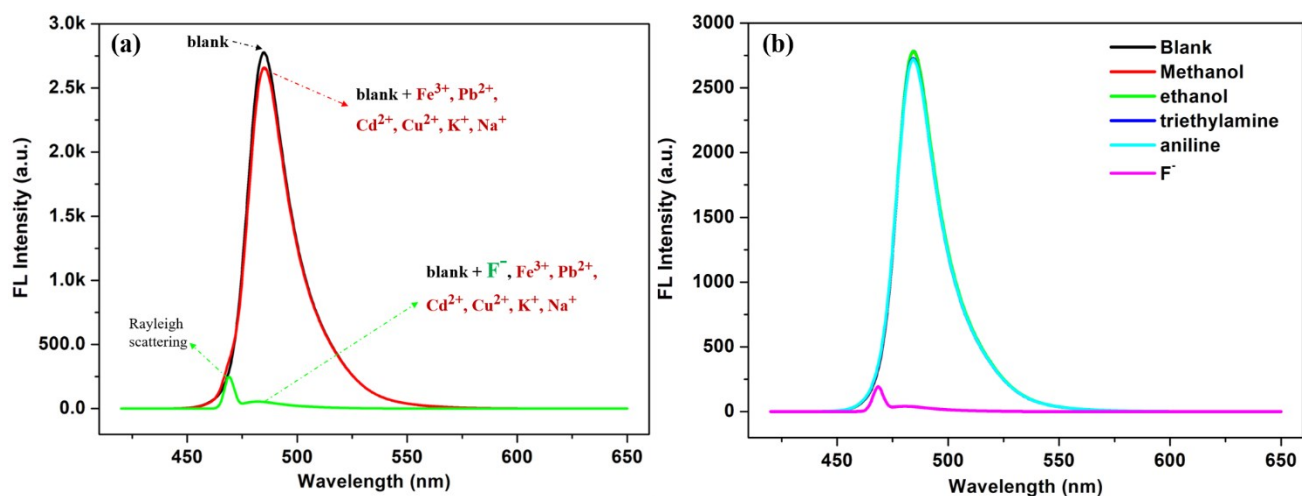

**Figure S12.** Quantitative histograms of the fluorescence responses of **BNCz** to the presence of different cations (a), alcohols and amines (b).

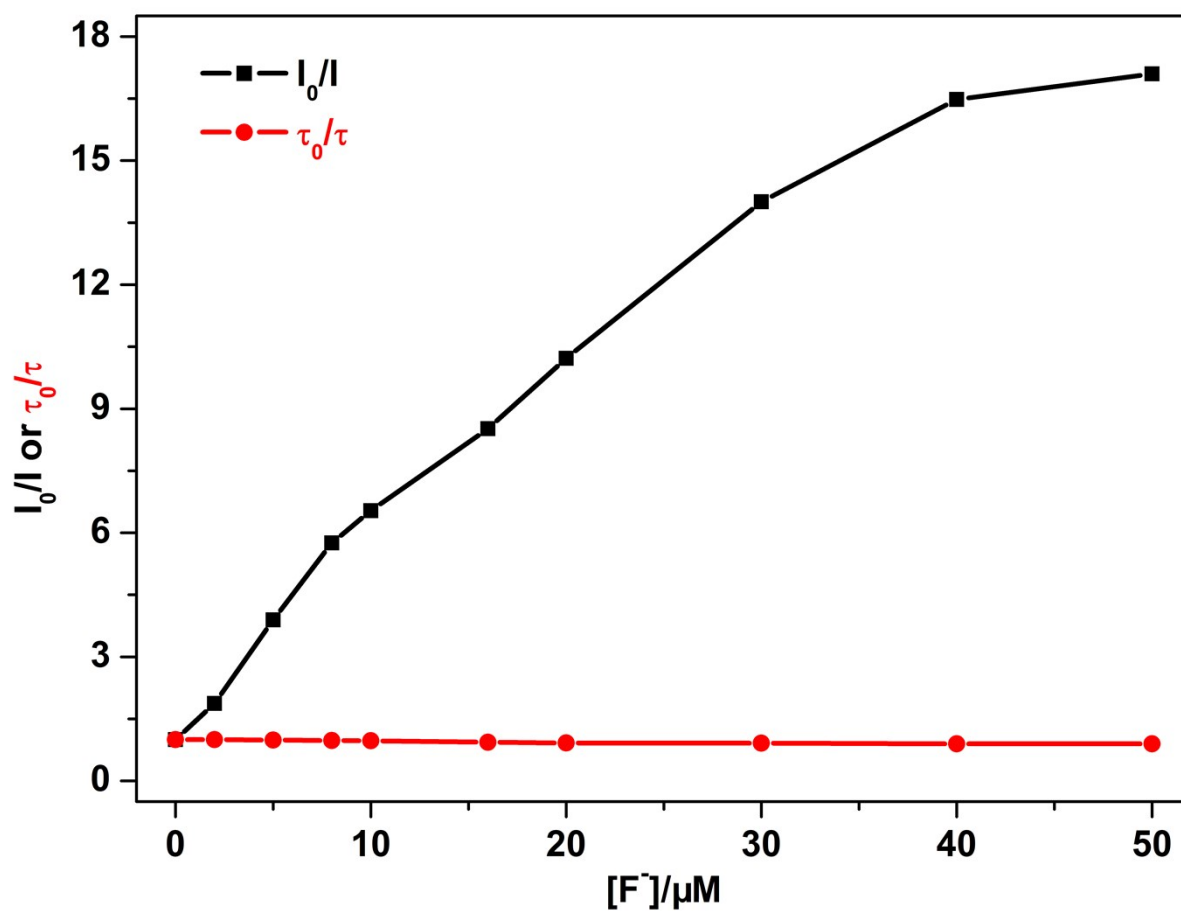

**Figure S13.** Stern–Volmer plots of fluorescence intensity ( $I_0/I$ ) and lifetime change ( $\tau_0/\tau$ ) as a function of  $[F^-]$  of BNCz ( $\lambda_{\text{em}} = 483 \text{ nm}$ ) in THF upon addition of  $n\text{-Bu}_4\text{NF}$ .



**Table S1.** Crystallographic data for **BNCz**.

| <b>Data</b>                                            | <b>BNCz</b>                                                        |
|--------------------------------------------------------|--------------------------------------------------------------------|
| CCDC                                                   | 2032277                                                            |
| formula                                                | C <sub>46</sub> H <sub>49</sub> BN <sub>2</sub>                    |
| fw                                                     | 640.68                                                             |
| <i>T</i> /K                                            | 190.15                                                             |
| Wavelength/ Å                                          | 1.34139                                                            |
| Crystal system                                         | monoclinic                                                         |
| Space group                                            | P2 <sub>1</sub> /c                                                 |
| <i>a</i> /Å                                            | 27.2771(7)                                                         |
| <i>b</i> /Å                                            | 5.7088(2)                                                          |
| <i>c</i> /Å                                            | 22.7716(6)                                                         |
| $\alpha$ , deg                                         | 90                                                                 |
| $\beta$ , deg                                          | 96.6240(10)                                                        |
| $\gamma$ , deg                                         | 90                                                                 |
| <i>V</i> /Å <sup>3</sup>                               | 3522.31(18)                                                        |
| <i>Z</i> , <i>D<sub>c</sub></i> /(g cm <sup>-3</sup> ) | 4, 1.208                                                           |
| $\mu$ /mm <sup>-1</sup>                                | 0.333                                                              |
| F(000)                                                 | 1376.0                                                             |
| 2 $\theta$ /deg                                        | 5.676 to 107.992                                                   |
| reflns measured                                        | 28145                                                              |
| reflns used ( <i>R</i> <sub>int</sub> )                | 6423 (0.0428)                                                      |
| GOF on F <sup>2</sup>                                  | 1.038                                                              |
| Final <i>R</i> [ <i>I</i> > 2 $\sigma$ ( <i>I</i> )]   | <i>R</i> <sub>1</sub> = 0.0376<br>w <i>R</i> <sub>2</sub> = 0.0898 |
| <i>R</i> (all data)                                    | <i>R</i> <sub>1</sub> = 0.0486<br>w <i>R</i> <sub>2</sub> = 0.0960 |

**Table S2.** Crystallographic data for **BNCz-FO**.

| <b>Data</b>                                            | <b>BNCz-FO</b>                        |
|--------------------------------------------------------|---------------------------------------|
| CCDC                                                   | 2032276                               |
| formula                                                | $C_{61}B_{0.62}F_{0.62}N_3H_{84.15}O$ |
| fw                                                     | 893.81                                |
| <i>T</i> /K                                            | 296(2)                                |
| Wavelength/ Å                                          | 0.71073                               |
| Crystal system                                         | monoclinic                            |
| Space group                                            | $P2_1/c$                              |
| <i>a</i> /Å                                            | 11.5553(16)                           |
| <i>b</i> /Å                                            | 32.283(5)                             |
| <i>c</i> /Å                                            | 19.119(3)                             |
| $\alpha$ , deg                                         | 90                                    |
| $\beta$ , deg                                          | 102.959(4)                            |
| $\gamma$ , deg                                         | 90                                    |
| <i>V</i> /Å <sup>3</sup>                               | 6950.5(17)                            |
| <i>Z</i> , <i>D<sub>c</sub></i> /(g cm <sup>-3</sup> ) | 4, 0.854                              |
| $\mu$ /mm <sup>-1</sup>                                | 0.051                                 |
| F(000)                                                 | 1951.0                                |
| 2 $\theta$ /deg                                        | 3.988 to 50.29                        |
| reflns measured                                        | 50537                                 |
| reflns used ( <i>R</i> <sub>int</sub> )                | 12292 (0.0848)                        |
| GOF on F <sup>2</sup>                                  | 1.064                                 |
| Final <i>R</i> [ <i>I</i> > 2 $\sigma$ ( <i>I</i> )]   | $R_1 = 0.1572$<br>$wR_2 = 0.3471$     |
| <i>R</i> (all data)                                    | $R_1 = 0.2304$<br>$wR_2 = 0.3820$     |

## Coordinates of molecular structures

**Table S3.** Cartesian coordinates of optimized geometry of **BNCz** (DFT, B3LYP/6-31g\*)

Standard orientation: (Ground State)

| Center<br>Number | Atomic<br>Number | Atomic<br>Type | Coordinates (Angstroms) |           |           |
|------------------|------------------|----------------|-------------------------|-----------|-----------|
|                  |                  |                | X                       | Y         | Z         |
| 1                | 6                | 0              | 1.239403                | -1.974008 | -0.014236 |
| 2                | 6                | 0              | 1.233726                | -3.373952 | 0.040345  |
| 3                | 6                | 0              | 0.021951                | -4.052244 | -0.015165 |
| 4                | 6                | 0              | -1.193145               | -3.380414 | -0.067545 |
| 5                | 6                | 0              | -1.205355               | -1.980398 | -0.007692 |
| 6                | 6                | 0              | 0.014908                | -1.233834 | -0.010304 |
| 7                | 7                | 0              | 2.446307                | -1.255079 | -0.047560 |
| 8                | 7                | 0              | -2.415410               | -1.267463 | 0.029918  |
| 9                | 6                | 0              | 3.787979                | -1.701626 | -0.166229 |
| 10               | 6                | 0              | -3.754588               | -1.720654 | 0.157277  |
| 11               | 6                | 0              | 2.484650                | 0.121963  | 0.173163  |
| 12               | 6                | 0              | -2.460335               | 0.109612  | -0.186365 |
| 13               | 6                | 0              | 4.652735                | -0.603572 | 0.072453  |
| 14               | 6                | 0              | 6.040363                | -0.759048 | 0.017002  |
| 15               | 6                | 0              | 6.605211                | -1.996910 | -0.300537 |
| 16               | 6                | 0              | 5.722476                | -3.058402 | -0.587918 |
| 17               | 6                | 0              | 4.335726                | -2.934343 | -0.534165 |
| 18               | 6                | 0              | 1.378235                | 0.978198  | 0.239686  |
| 19               | 6                | 0              | 1.686410                | 2.325558  | 0.514893  |
| 20               | 6                | 0              | 2.996419                | 2.811153  | 0.683213  |
| 21               | 6                | 0              | 4.064766                | 1.906845  | 0.551917  |
| 22               | 6                | 0              | 3.815932                | 0.560068  | 0.291430  |
| 23               | 6                | 0              | -4.292713               | -2.957254 | 0.525752  |
| 24               | 6                | 0              | -5.678478               | -3.088938 | 0.589544  |
| 25               | 6                | 0              | -6.569017               | -2.031614 | 0.312231  |
| 26               | 6                | 0              | -6.012933               | -0.789772 | -0.006311 |
| 27               | 6                | 0              | -4.626918               | -0.627137 | -0.072085 |
| 28               | 6                | 0              | -3.797558               | 0.542201  | -0.294262 |
| 29               | 6                | 0              | -4.049530               | 1.885227  | -0.547576 |
| 30               | 6                | 0              | -2.983487               | 2.798751  | -0.686374 |
| 31               | 6                | 0              | -1.674125               | 2.321728  | -0.529613 |
| 32               | 6                | 0              | -1.360852               | 0.970110  | -0.257243 |
| 33               | 6                | 0              | -3.298784               | 4.276149  | -0.996450 |
| 34               | 6                | 0              | -8.088146               | -2.272423 | 0.387905  |
| 35               | 6                | 0              | 3.218696                | 4.305205  | 0.997076  |

|    |   |   |           |           |           |
|----|---|---|-----------|-----------|-----------|
| 36 | 6 | 0 | 8.126123  | -2.229686 | -0.365001 |
| 37 | 6 | 0 | 8.925597  | -0.955726 | -0.032815 |
| 38 | 6 | 0 | 8.522959  | -2.687746 | -1.788604 |
| 39 | 6 | 0 | 8.522079  | -3.325400 | 0.653094  |
| 40 | 6 | 0 | 4.710881  | 4.656699  | 1.150410  |
| 41 | 6 | 0 | 2.504430  | 4.666114  | 2.321249  |
| 42 | 6 | 0 | 2.640933  | 5.169683  | -0.148543 |
| 43 | 6 | 0 | -2.027823 | 5.137804  | -1.119500 |
| 44 | 6 | 0 | -4.170387 | 4.868623  | 0.136252  |
| 45 | 6 | 0 | -4.067986 | 4.368923  | -2.335882 |
| 46 | 6 | 0 | -8.896651 | -1.000944 | 0.068514  |
| 47 | 6 | 0 | -8.471095 | -2.739194 | 1.812466  |
| 48 | 6 | 0 | -8.486722 | -3.365284 | -0.632233 |
| 49 | 5 | 0 | 0.010108  | 0.311048  | -0.010067 |
| 50 | 1 | 0 | 2.148555  | -3.933142 | 0.152011  |
| 51 | 1 | 0 | 0.025012  | -5.138466 | -0.017683 |
| 52 | 1 | 0 | -2.105286 | -3.943518 | -0.181779 |
| 53 | 1 | 0 | 6.668516  | 0.102427  | 0.212370  |
| 54 | 1 | 0 | 6.126966  | -4.023798 | -0.876118 |
| 55 | 1 | 0 | 3.725391  | -3.778546 | -0.820502 |
| 56 | 1 | 0 | 0.861290  | 3.021620  | 0.618051  |
| 57 | 1 | 0 | 5.088919  | 2.246097  | 0.656044  |
| 58 | 1 | 0 | -3.675374 | -3.798821 | 0.804585  |
| 59 | 1 | 0 | -6.075411 | -4.057470 | 0.877680  |
| 60 | 1 | 0 | -6.647242 | 0.068891  | -0.194193 |
| 61 | 1 | 0 | -5.075811 | 2.227678  | -0.643145 |
| 62 | 1 | 0 | -0.850010 | 3.014399  | -0.638394 |
| 63 | 1 | 0 | 8.709935  | -0.591613 | 0.976985  |
| 64 | 1 | 0 | 9.997977  | -1.169334 | -0.084706 |
| 65 | 1 | 0 | 8.716085  | -0.147324 | -0.740994 |
| 66 | 1 | 0 | 8.020730  | -3.616874 | -2.072806 |
| 67 | 1 | 0 | 9.603184  | -2.863381 | -1.845764 |
| 68 | 1 | 0 | 8.262291  | -1.926839 | -2.531354 |
| 69 | 1 | 0 | 8.265477  | -3.022798 | 1.673530  |
| 70 | 1 | 0 | 9.601448  | -3.511564 | 0.614418  |
| 71 | 1 | 0 | 8.013989  | -4.272591 | 0.449372  |
| 72 | 1 | 0 | 5.274353  | 4.455848  | 0.233196  |
| 73 | 1 | 0 | 5.179013  | 4.100948  | 1.969545  |
| 74 | 1 | 0 | 4.816732  | 5.723177  | 1.373594  |
| 75 | 1 | 0 | 2.902001  | 4.076039  | 3.153396  |
| 76 | 1 | 0 | 1.427854  | 4.480356  | 2.267287  |
| 77 | 1 | 0 | 2.648081  | 5.726818  | 2.556892  |
| 78 | 1 | 0 | 3.133515  | 4.939632  | -1.098941 |
| 79 | 1 | 0 | 1.567634  | 5.005850  | -0.281873 |

|    |   |   |           |           |           |
|----|---|---|-----------|-----------|-----------|
| 80 | 1 | 0 | 2.790588  | 6.234599  | 0.063191  |
| 81 | 1 | 0 | -1.375058 | 4.789554  | -1.926491 |
| 82 | 1 | 0 | -1.449245 | 5.147538  | -0.189790 |
| 83 | 1 | 0 | -2.305953 | 6.172631  | -1.343589 |
| 84 | 1 | 0 | -3.645664 | 4.825567  | 1.096204  |
| 85 | 1 | 0 | -4.410212 | 5.917156  | -0.073903 |
| 86 | 1 | 0 | -5.115675 | 4.329377  | 0.249393  |
| 87 | 1 | 0 | -3.470331 | 3.962881  | -3.158415 |
| 88 | 1 | 0 | -4.304574 | 5.413076  | -2.570218 |
| 89 | 1 | 0 | -5.010753 | 3.814647  | -2.304953 |
| 90 | 1 | 0 | -8.685089 | -0.194909 | 0.778777  |
| 91 | 1 | 0 | -8.691623 | -0.631040 | -0.941416 |
| 92 | 1 | 0 | -9.967450 | -1.220142 | 0.128520  |
| 93 | 1 | 0 | -8.207584 | -1.980815 | 2.556797  |
| 94 | 1 | 0 | -9.550044 | -2.919719 | 1.877664  |
| 95 | 1 | 0 | -7.962764 | -3.667587 | 2.088075  |
| 96 | 1 | 0 | -8.240644 | -3.056262 | -1.653332 |
| 97 | 1 | 0 | -9.564654 | -3.557650 | -0.585200 |
| 98 | 1 | 0 | -7.971662 | -4.310615 | -0.437552 |

---

|                                              |              |
|----------------------------------------------|--------------|
| Zero-point correction=                       | 0.837624     |
| Thermal correction to Energy=                | 0.881881     |
| Thermal correction to Enthalpy=              | 0.882826     |
| Thermal correction to Gibbs Free Energy=     | 0.761667     |
| Sum of electronic and zero-point Energies=   | -1916.147241 |
| Sum of electronic and thermal Energies=      | -1916.102984 |
| Sum of electronic and thermal Enthalpies=    | -1916.102039 |
| Sum of electronic and thermal Free Energies= | -1916.223197 |

**Table S4.** Cartesian coordinates of optimized geometry of **BNCz-F** (DFT, B3LYP/6-31g\*)

Standard orientation: (Ground State)

| Center<br>Number | Atomic<br>Number | Atomic<br>Type | Coordinates (Angstroms) |           |           |
|------------------|------------------|----------------|-------------------------|-----------|-----------|
|                  |                  |                | X                       | Y         | Z         |
| 1                | 6                | 0              | 1.312973                | -1.939683 | -0.505522 |
| 2                | 6                | 0              | 1.370262                | -3.335278 | -0.372567 |
| 3                | 6                | 0              | 0.184011                | -4.061129 | -0.390586 |
| 4                | 6                | 0              | -1.048228               | -3.418320 | -0.427415 |
| 5                | 6                | 0              | -1.093051               | -2.013111 | -0.438331 |
| 6                | 6                | 0              | 0.082945                | -1.245671 | -0.584665 |
| 7                | 7                | 0              | 2.502470                | -1.156149 | -0.462604 |
| 8                | 7                | 0              | -2.334474               | -1.326650 | -0.317845 |
| 9                | 6                | 0              | 3.839558                | -1.560332 | -0.391084 |
| 10               | 6                | 0              | -3.605969               | -1.802036 | 0.028339  |
| 11               | 6                | 0              | 2.452592                | 0.192801  | -0.065174 |
| 12               | 6                | 0              | -2.441152               | 0.064973  | -0.514189 |
| 13               | 6                | 0              | 4.624065                | -0.489115 | 0.127074  |
| 14               | 6                | 0              | 6.006527                | -0.632840 | 0.281424  |
| 15               | 6                | 0              | 6.649635                | -1.818685 | -0.087282 |
| 16               | 6                | 0              | 5.856316                | -2.847379 | -0.639795 |
| 17               | 6                | 0              | 4.477397                | -2.737246 | -0.802614 |
| 18               | 6                | 0              | 1.316956                | 1.008121  | -0.114863 |
| 19               | 6                | 0              | 1.510976                | 2.286396  | 0.410548  |
| 20               | 6                | 0              | 2.755282                | 2.768482  | 0.898918  |
| 21               | 6                | 0              | 3.870326                | 1.928131  | 0.841629  |
| 22               | 6                | 0              | 3.722638                | 0.621691  | 0.352364  |
| 23               | 6                | 0              | -4.064802               | -3.054385 | 0.465241  |
| 24               | 6                | 0              | -5.416814               | -3.217121 | 0.757354  |
| 25               | 6                | 0              | -6.362770               | -2.176614 | 0.647164  |
| 26               | 6                | 0              | -5.889048               | -0.921374 | 0.256478  |
| 27               | 6                | 0              | -4.536382               | -0.723829 | -0.035425 |
| 28               | 6                | 0              | -3.786821               | 0.462384  | -0.380380 |
| 29               | 6                | 0              | -4.124357               | 1.806469  | -0.557976 |
| 30               | 6                | 0              | -3.123483               | 2.739033  | -0.860122 |
| 31               | 6                | 0              | -1.789552               | 2.282235  | -0.960216 |
| 32               | 6                | 0              | -1.395083               | 0.947859  | -0.779718 |
| 33               | 6                | 0              | -3.512152               | 4.218192  | -1.067619 |
| 34               | 6                | 0              | -7.842453               | -2.452177 | 0.972367  |
| 35               | 6                | 0              | 2.837446                | 4.206571  | 1.449929  |
| 36               | 6                | 0              | 8.168361                | -2.028227 | 0.063424  |
| 37               | 6                | 0              | 8.869802                | -0.806179 | 0.685645  |

|    |   |   |           |           |           |
|----|---|---|-----------|-----------|-----------|
| 38 | 6 | 0 | 8.801221  | -2.284515 | -1.325112 |
| 39 | 6 | 0 | 8.438302  | -3.247755 | 0.976522  |
| 40 | 6 | 0 | 4.250238  | 4.569577  | 1.945723  |
| 41 | 6 | 0 | 1.863454  | 4.360840  | 2.642291  |
| 42 | 6 | 0 | 2.449393  | 5.216665  | 0.343973  |
| 43 | 6 | 0 | -2.299227 | 5.111920  | -1.388807 |
| 44 | 6 | 0 | -4.178507 | 4.767774  | 0.216295  |
| 45 | 6 | 0 | -4.510008 | 4.333284  | -2.244673 |
| 46 | 6 | 0 | -8.721861 | -1.199354 | 0.799639  |
| 47 | 6 | 0 | -7.977743 | -2.931569 | 2.437335  |
| 48 | 6 | 0 | -8.386496 | -3.550084 | 0.027508  |
| 49 | 5 | 0 | 0.089851  | 0.350056  | -0.952281 |
| 50 | 1 | 0 | 2.309180  | -3.850413 | -0.229800 |
| 51 | 1 | 0 | 0.218445  | -5.147068 | -0.348837 |
| 52 | 1 | 0 | -1.949337 | -4.008975 | -0.486371 |
| 53 | 1 | 0 | 6.571256  | 0.202681  | 0.681140  |
| 54 | 1 | 0 | 6.329921  | -3.768279 | -0.969682 |
| 55 | 1 | 0 | 3.931664  | -3.540352 | -1.280578 |
| 56 | 1 | 0 | 0.658151  | 2.960656  | 0.424743  |
| 57 | 1 | 0 | 4.845979  | 2.266167  | 1.174346  |
| 58 | 1 | 0 | -3.396699 | -3.887608 | 0.624417  |
| 59 | 1 | 0 | -5.740221 | -4.198764 | 1.093286  |
| 60 | 1 | 0 | -6.559711 | -0.071748 | 0.185540  |
| 61 | 1 | 0 | -5.161356 | 2.117730  | -0.457126 |
| 62 | 1 | 0 | -1.009854 | 2.995324  | -1.204171 |
| 63 | 1 | 0 | 8.481157  | -0.581967 | 1.684287  |
| 64 | 1 | 0 | 9.943573  | -1.002585 | 0.782166  |
| 65 | 1 | 0 | 8.750172  | 0.088660  | 0.066402  |
| 66 | 1 | 0 | 8.374320  | -3.168924 | -1.806851 |
| 67 | 1 | 0 | 9.883711  | -2.441289 | -1.236256 |
| 68 | 1 | 0 | 8.632742  | -1.431507 | -1.990505 |
| 69 | 1 | 0 | 8.014490  | -3.087515 | 1.973371  |
| 70 | 1 | 0 | 9.516509  | -3.419515 | 1.086849  |
| 71 | 1 | 0 | 7.993834  | -4.161565 | 0.571438  |
| 72 | 1 | 0 | 4.988806  | 4.517818  | 1.138835  |
| 73 | 1 | 0 | 4.579873  | 3.903978  | 2.750505  |
| 74 | 1 | 0 | 4.256779  | 5.593765  | 2.336307  |
| 75 | 1 | 0 | 2.127745  | 3.669541  | 3.449618  |
| 76 | 1 | 0 | 0.831887  | 4.147231  | 2.349971  |
| 77 | 1 | 0 | 1.896740  | 5.382649  | 3.041946  |
| 78 | 1 | 0 | 3.133975  | 5.140759  | -0.507430 |
| 79 | 1 | 0 | 1.437980  | 5.036171  | -0.030328 |
| 80 | 1 | 0 | 2.489301  | 6.245216  | 0.725316  |
| 81 | 1 | 0 | -1.794796 | 4.796125  | -2.307051 |

|    |   |   |           |           |           |
|----|---|---|-----------|-----------|-----------|
| 82 | 1 | 0 | -1.562857 | 5.101519  | -0.579017 |
| 83 | 1 | 0 | -2.628060 | 6.148608  | -1.526833 |
| 84 | 1 | 0 | -3.490956 | 4.704972  | 1.066240  |
| 85 | 1 | 0 | -4.466502 | 5.819000  | 0.086422  |
| 86 | 1 | 0 | -5.079255 | 4.204545  | 0.478067  |
| 87 | 1 | 0 | -4.057962 | 3.965154  | -3.171505 |
| 88 | 1 | 0 | -4.809245 | 5.377775  | -2.401097 |
| 89 | 1 | 0 | -5.416670 | 3.748055  | -2.063998 |
| 90 | 1 | 0 | -8.409526 | -0.390112 | 1.467619  |
| 91 | 1 | 0 | -8.690642 | -0.821829 | -0.227567 |
| 92 | 1 | 0 | -9.764708 | -1.440519 | 1.034587  |
| 93 | 1 | 0 | -7.612180 | -2.167141 | 3.130807  |
| 94 | 1 | 0 | -9.026607 | -3.141821 | 2.681494  |
| 95 | 1 | 0 | -7.403281 | -3.844747 | 2.619228  |
| 96 | 1 | 0 | -8.311594 | -3.233426 | -1.017973 |
| 97 | 1 | 0 | -9.440425 | -3.763619 | 0.245900  |
| 98 | 1 | 0 | -7.827287 | -4.484609 | 0.130702  |
| 99 | 9 | 0 | 0.462003  | 0.461642  | -2.352477 |

---

|                                              |              |
|----------------------------------------------|--------------|
| Zero-point correction=                       | 0.837948     |
| Thermal correction to Energy=                | 0.883398     |
| Thermal correction to Enthalpy=              | 0.884343     |
| Thermal correction to Gibbs Free Energy=     | 0.761509     |
| Sum of electronic and zero-point Energies=   | -2016.073666 |
| Sum of electronic and thermal Energies=      | -2016.028216 |
| Sum of electronic and thermal Enthalpies=    | -2016.027272 |
| Sum of electronic and thermal Free Energies= | -2016.150106 |



## References

1. Y. Xu, Z. Cheng, Z. Li, B. Liang, J. Wang, J. Wei, Z. Zhang and Y. Wang, *Adv. Optical Mater.*, 2020, 1902142.
2. B. Wrackmeyer, *Prog Nucl Magn Reson Spectrosc.*, 1979, **12**, 227-259.
3. K. N. Jarzemska, R. Kamiński, K. Durka, M. Kubsik, K. Nawara, E. Witkowska, M. Wiloch, S. Luliński, J. Waluk, I. Głowacki and K. Woźniak, *Dyes Pigm.*, 2017, **138**, 267-277.
4. D. L. Crossley, J. Cid, L. D. Curless, M. L. Turner and M. J. Ingleson, *Organometallics*, 2015, **34**, 5767-5774.
5. G. Sheldrick, *Acta Crystallogr. A*, 2008, **64**, 112-122.
6. Gaussian 09, Revision D.01, M. J. Frisch, G.W. Trucks, H. B. Schlegel, G. E. Scuseria, M. A. Robb, J. R. Cheeseman, G. Scalmani, V. Barone, B. Mennucci, G. A. Petersson, H. Nakatsuji, M. Caricato, X. Li, H. P. Hratchian, A. F. Izmaylov, J. Bloino, G. Zheng, J. L. Sonnenberg, M. Hada, M. Ehara, K. Toyota, R. Fukuda, J. Hasegawa, M. Ishida, T. Nakajima, Y. Honda, O. Kitao, H. Nakai, T. Vreven, J. A. Montgomery Jr., J. E. Peralta, F. Ogliaro, M. Bearpark, J. J. Heyd, E. Brothers, K.N. Kudin, V. N. Staroverov, T. Keith, R. Kobayashi, J. Normand, K. Raghavachari, Rendell, A. J.C. Burant, S. S. Iyengar, J. Tomasi, M. Cossi, N. Rega, J. M. Millam, M. Klene, J. E. Knox, J. B. Cross, V. Bakken, C. Adamo, J. Jaramillo, R. Gomperts, R. E. Stratmann, O. Yazyev, A. J. Austin, R. Cammi, C. Pomelli, J.W. Ochterski, R. L. Martin, K. Morokuma, V. G. Zakrzewski, G. A. Voth, P. Salvador, J. J. Dannenberg, S. Dapprich, A. D. Daniels, O. Farkas, J. B. Foresman, J. V. Ortiz, J. Cioslowski, D. J. Fox, Gaussian, Inc., Wallingford CT, 2013.
